# Supplementary material
Source: PubMed Central journal article supplement (PMC5705290)
Supplement: NIHMS911278-supplement-Supplemental_Material.pdf [file NIHMS911278-supplement-Supplemental_Material.pdf]

Supplemental Material:

Supplemental Material I: Therapy Time Estimates from CPT Code to Revenue Code

| <b>Therapy Type</b>     | <b>Revenue Code</b> | <b>Weighted Therapy Minutes Mapped with CPT Code</b> |
|-------------------------|---------------------|------------------------------------------------------|
| Physical Therapy        | 0420                | 14.29                                                |
|                         | 0421                | 14.24                                                |
|                         | 0422                | 14.38                                                |
|                         | 0423                | 10.05                                                |
|                         | 0424                | 29.1                                                 |
|                         | 0429                | 14.96                                                |
| Occupational Therapy    | 0430                | 15.09                                                |
|                         | 0431                | 14.87                                                |
|                         | 0432                | 15.03                                                |
|                         | 0433                | 10.24                                                |
|                         | 0434                | 43.46                                                |
|                         | 0439                | 14.9                                                 |
| Speech/Language Therapy | 0440                | 44.16                                                |
|                         | 0441                | 16.94                                                |
|                         | 0442                | 46.7                                                 |
|                         | 0443                | 19.27                                                |
|                         | 0444                | 28.74                                                |
|                         | 0449                | 43.19                                                |

Supplemental Table II: Predictors of Minutes of Physical Therapy Received within One Year of the Stroke.

| Demographic Characteristic , %(n)                                 | Estimate | P value |
|-------------------------------------------------------------------|----------|---------|
| Age (Year)                                                        | -1.6     | <0.01   |
| Black                                                             | 19.0     | 0.12    |
| Men                                                               | -65.5    | <0.01   |
| Length of hospitalization, Mean (SD)                              | 34.1     | <0.01   |
| Intracerebral Hemorrhage                                          | 138.1    | <0.01   |
| Tissue plasminogen activator (tPA)                                | -51.4    | <0.01   |
| Acute intra-arterial treatment                                    | 382.8    | <0.01   |
| Comorbidities                                                     |          |         |
| Congestive heart failure                                          | -48.0    | <0.001  |
| Valvular and rheumatic heart disease                              | -4.6     | 0.74    |
| Congenital cardiac/circulatory defects                            | -102.0   | 0.01    |
| Hypertensive heart disease                                        | 51.3     | 0.15    |
| Heart arrhythmias                                                 | -42.1    | <0.01   |
| Cerebral hemorrhage                                               | -15.0    | 0.53    |
| Ischemic/unspecified stroke                                       | 37.4     | 0.12    |
| Precerebral arterial occlusion/ transient cerebral ischemia       | -18.1    | 0.19    |
| Cerebral atherosclerosis/ aneurysm                                | 29.0     | 0.13    |
| Hemiplegia/ hemiparesis                                           | 545.9    | <0.01   |
| History of infection                                              | 96.4     | <0.01   |
| Metastatic cancer / acute leukemia / other major cancers          | -572.2   | <0.01   |
| Lymphatic, head, neck, brain, breast, colorectal and other cancer | -79.1    | <0.01   |
| Protein-calorie malnutrition                                      | -221.5   | <0.01   |
| Other significant endocrine and metabolic disorders               | -19.7    | 0.02    |
| Other gastrointestinal disorders                                  | 6.8      | 0.50    |
| Disorders of vertebrae/ spinal discs                              | 174.9    | <0.01   |
| Osteoarthritis of hip or knee                                     | 183.7    | <0.01   |
| Other musculoskeletal/ connective tissue disorders                | 158.9    | <0.01   |
| Iron deficiency/ unspecified anemia and blood disease             | 51.0     | <0.01   |
| Dementia                                                          | -48.1    | <0.01   |
| Major psychiatric disorders                                       | 131.7    | <0.01   |
| Quadriplegia/ other extensive paralysis                           | 51.5     | 0.34    |
| Multiple sclerosis                                                | 221.4    | 0.01    |
| Seizure disorders, convulsions                                    | -42.9    | 0.02    |
| hypertension                                                      | 30.2     | <0.01   |
| Peripheral vascular disease                                       | -24.1    | 0.07    |
| Chronic obstructive pulmonary disease                             | -37.9    | <0.01   |
| Pneumonia                                                         | -103.9   | <0.01   |
| Pleural effusion/pneumothorax                                     | -183.0   | <0.01   |

|                                            |        |       |
|--------------------------------------------|--------|-------|
| Other eye disorder                         | -32.2  | 0.09  |
| Other ear, nose, throat and mouth disorder | -50.9  | 0.03  |
| Dialysis status                            | -66.4  | 0.21  |
| Renal failure                              | -36.2  | <0.01 |
| Urinary tract infection                    | 67.2   | <.001 |
| Male genital disorders                     | 27.1   | 0.12  |
| Decubitus ulcer of skin                    | -193.7 | <0.01 |
| Chronic ulcer of skin, Except decubitus    | 33.2   | 0.46  |
| Life Sustaining Procedures                 |        |       |
| Gastrostomy                                | 141.8  | <0.01 |
| Hemicraniectomy                            | 440.6  | <0.01 |
| Ventriculostomy                            | 762.8  | 0.06  |
| Tracheostomy                               | -59.0  | 0.26  |
| Intubation                                 | -313.7 | <0.01 |
| Hemodialysis                               | -90.9  | 0.02  |
| Cardiopulmonary Resuscitation              | -631.8 | <0.01 |
